# Supplementary material for: The Qc5 Allele Increases Wheat Bread-Making Quality by Regulating SPA and SPR
Source: MDPI journal article supplement (doi:10.3390/ijms23147581), 2022-07-08
Supplement: s1 [file s1]

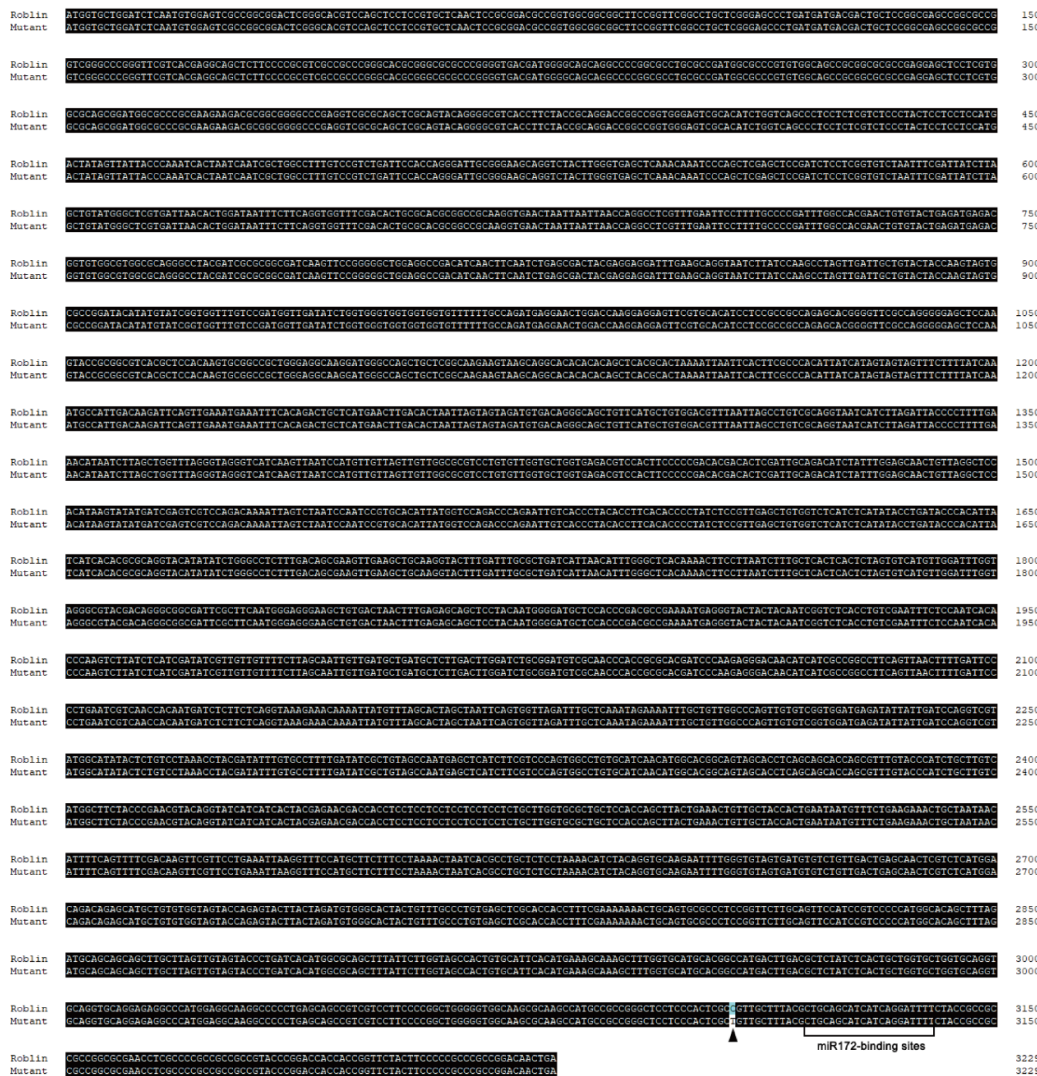

**Figure S1.** Alignment of the DNA sequences of Q and Q<sup>ε5</sup> alleles. The miRNA172-binding site is boxed with black lines, and the SNP flanking the miRNA172-binding site is indicated with black arrow.

|                      |                                                                                                                   |      |
|----------------------|-------------------------------------------------------------------------------------------------------------------|------|
| Q                    | ATGGTGTGGATCTCAATGTGGAGTCGCCGCGGACTCGGGACATGCCAGTCTCCGTGCTCAACTCCGCGGACGCCGGTGGCGGCGCTTCGGGTTTCGGCTGCTCGGGAGCC    | 115  |
| Q <sup>1</sup>       | ATGGTGTGGATCTCAATGTGGAGTCGCCGCGGACTCGGGACATGCCAGTCTCCGTGCTCAACTCCGCGGACGCCGGTGGCGGCGCTTCGGGTTTCGGCTGCTCGGGAGCC    | 115  |
| Q <sup>2</sup>       | ATGGTGTGGATCTCAATGTGGAGTCGCCGCGGACTCGGGACATGCCAGTCTCCGTGCTCAACTCCGCGGACGCCGGTGGCGGCGCTTCGGGTTTCGGCTGCTCGGGAGCC    | 115  |
| Q <sup>3</sup>       | ATGGTGTGGATCTCAATGTGGAGTCGCCGCGGACTCGGGACATGCCAGTCTCCGTGCTCAACTCCGCGGACGCCGGTGGCGGCGCTTCGGGTTTCGGCTGCTCGGGAGCC    | 115  |
| Q <sup>4</sup>       | ATGGTGTGGATCTCAATGTGGAGTCGCCGCGGACTCGGGACATGCCAGTCTCCGTGCTCAACTCCGCGGACGCCGGTGGCGGCGCTTCGGGTTTCGGCTGCTCGGGAGCC    | 115  |
| Q <sup>5</sup>       | ATGGTGTGGATCTCAATGTGGAGTCGCCGCGGACTCGGGACATGCCAGTCTCCGTGCTCAACTCCGCGGACGCCGGTGGCGGCGCTTCGGGTTTCGGCTGCTCGGGAGCC    | 115  |
| Q                    | CTGATGATGACGACTCTCCGCGGAGCCGCGCGGCTCGGGCCGGGTTGCTCAGGAGGAGCTCTTCCCGCGCTCGCGCGCGGACGCGGGGCGCGCGGGGTTGACATGGG       | 230  |
| Q <sup>1</sup>       | CTGATGATGACGACTCTCCGCGGAGCCGCGCGGCTCGGGCCGGGTTGCTCAGGAGGAGCTCTTCCCGCGCTCGCGCGCGGACGCGGGGCGCGCGGGGTTGACATGGG       | 230  |
| Q <sup>2</sup>       | CTGATGATGACGACTCTCCGCGGAGCCGCGCGGCTCGGGCCGGGTTGCTCAGGAGGAGCTCTTCCCGCGCTCGCGCGCGGACGCGGGGCGCGCGGGGTTGACATGGG       | 230  |
| Q <sup>3</sup>       | CTGATGATGACGACTCTCCGCGGAGCCGCGCGGCTCGGGCCGGGTTGCTCAGGAGGAGCTCTTCCCGCGCTCGCGCGCGGACGCGGGGCGCGCGGGGTTGACATGGG       | 230  |
| Q <sup>4</sup>       | CTGATGATGACGACTCTCCGCGGAGCCGCGCGGCTCGGGCCGGGTTGCTCAGGAGGAGCTCTTCCCGCGCTCGCGCGCGGACGCGGGGCGCGCGGGGTTGACATGGG       | 230  |
| Q <sup>5</sup>       | CTGATGATGACGACTCTCCGCGGAGCCGCGCGGCTCGGGCCGGGTTGCTCAGGAGGAGCTCTTCCCGCGCTCGCGCGCGGACGCGGGGCGCGCGGGGTTGACATGGG       | 230  |
| Q                    | SCAGCAGGCCCCGGCGCTGCGCCGATGCGGCCGCTGTGGCAGCGCGGCGCGCGGAGGAGTCTCTGCTGGCGCAGCGGATGGCGCCCGCGAAGAGACGCGCGGGGCGCGAGG   | 345  |
| Q <sup>1</sup>       | SCAGCAGGCCCCGGCGCTGCGCCGATGCGGCCGCTGTGGCAGCGCGGCGCGCGGAGGAGTCTCTGCTGGCGCAGCGGATGGCGCCCGCGAAGAGACGCGCGGGGCGCGAGG   | 345  |
| Q <sup>2</sup>       | SCAGCAGGCCCCGGCGCTGCGCCGATGCGGCCGCTGTGGCAGCGCGGCGCGCGGAGGAGTCTCTGCTGGCGCAGCGGATGGCGCCCGCGAAGAGACGCGCGGGGCGCGAGG   | 345  |
| Q <sup>3</sup>       | SCAGCAGGCCCCGGCGCTGCGCCGATGCGGCCGCTGTGGCAGCGCGGCGCGCGGAGGAGTCTCTGCTGGCGCAGCGGATGGCGCCCGCGAAGAGACGCGCGGGGCGCGAGG   | 345  |
| Q <sup>4</sup>       | SCAGCAGGCCCCGGCGCTGCGCCGATGCGGCCGCTGTGGCAGCGCGGCGCGCGGAGGAGTCTCTGCTGGCGCAGCGGATGGCGCCCGCGAAGAGACGCGCGGGGCGCGAGG   | 345  |
| Q <sup>5</sup>       | SCAGCAGGCCCCGGCGCTGCGCCGATGCGGCCGCTGTGGCAGCGCGGCGCGCGGAGGAGTCTCTGCTGGCGCAGCGGATGGCGCCCGCGAAGAGACGCGCGGGGCGCGAGG   | 345  |
| Q                    | TCGCGCAGCTCGCAGTACAGGGGCGTCACTTCTACCGCAGGACCGGGCGGTGGGAGTCGCACATCTGGGATTGCGGGAAGCAGGTCTACTTGGTGGTTTGCACACTGCGCACG | 460  |
| Q <sup>1</sup>       | TCGCGCAGCTCGCAGTACAGGGGCGTCACTTCTACCGCAGGACCGGGCGGTGGGAGTCGCACATCTGGGATTGCGGGAAGCAGGTCTACTTGGTGGTTTGCACACTGCGCACG | 460  |
| Q <sup>2</sup>       | TCGCGCAGCTCGCAGTACAGGGGCGTCACTTCTACCGCAGGACCGGGCGGTGGGAGTCGCACATCTGGGATTGCGGGAAGCAGGTCTACTTGGTGGTTTGCACACTGCGCACG | 460  |
| Q <sup>3</sup>       | TCGCGCAGCTCGCAGTACAGGGGCGTCACTTCTACCGCAGGACCGGGCGGTGGGAGTCGCACATCTGGGATTGCGGGAAGCAGGTCTACTTGGTGGTTTGCACACTGCGCACG | 460  |
| Q <sup>4</sup>       | TCGCGCAGCTCGCAGTACAGGGGCGTCACTTCTACCGCAGGACCGGGCGGTGGGAGTCGCACATCTGGGATTGCGGGAAGCAGGTCTACTTGGTGGTTTGCACACTGCGCACG | 460  |
| Q <sup>5</sup>       | TCGCGCAGCTCGCAGTACAGGGGCGTCACTTCTACCGCAGGACCGGGCGGTGGGAGTCGCACATCTGGGATTGCGGGAAGCAGGTCTACTTGGTGGTTTGCACACTGCGCACG | 460  |
| Q                    | CGCGCGCAGGGGCTACGATCGCGCGGATCAAGTTTCGGGGGCTGGAGGCCGACATCAACTTCAATCTGAGCGACTACGAGGAGGATTGAGCAGATGAGGAACGTGGACAA    | 575  |
| Q <sup>1</sup>       | CGCGCGCAGGGGCTACGATCGCGCGGATCAAGTTTCGGGGGCTGGAGGCCGACATCAACTTCAATCTGAGCGACTACGAGGAGGATTGAGCAGATGAGGAACGTGGACAA    | 575  |
| Q <sup>2</sup>       | CGCGCGCAGGGGCTACGATCGCGCGGATCAAGTTTCGGGGGCTGGAGGCCGACATCAACTTCAATCTGAGCGACTACGAGGAGGATTGAGCAGATGAGGAACGTGGACAA    | 575  |
| Q <sup>3</sup>       | CGCGCGCAGGGGCTACGATCGCGCGGATCAAGTTTCGGGGGCTGGAGGCCGACATCAACTTCAATCTGAGCGACTACGAGGAGGATTGAGCAGATGAGGAACGTGGACAA    | 575  |
| Q <sup>4</sup>       | CGCGCGCAGGGGCTACGATCGCGCGGATCAAGTTTCGGGGGCTGGAGGCCGACATCAACTTCAATCTGAGCGACTACGAGGAGGATTGAGCAGATGAGGAACGTGGACAA    | 575  |
| Q <sup>5</sup>       | CGCGCGCAGGGGCTACGATCGCGCGGATCAAGTTTCGGGGGCTGGAGGCCGACATCAACTTCAATCTGAGCGACTACGAGGAGGATTGAGCAGATGAGGAACGTGGACAA    | 575  |
| Q                    | GGAGGAGTTCGTGCACATCTCCGCGCCGACGAGCAGGGGTTTCGCGAGGGGGAGCTCCAAGTACCGGGCGTCAAGTCCCAAGTGCAGCGCTGGGAGGCAAGGATGGGCCAG   | 690  |
| Q <sup>1</sup>       | GGAGGAGTTCGTGCACATCTCCGCGCCGACGAGCAGGGGTTTCGCGAGGGGGAGCTCCAAGTACCGGGCGTCAAGTCCCAAGTGCAGCGCTGGGAGGCAAGGATGGGCCAG   | 690  |
| Q <sup>2</sup>       | GGAGGAGTTCGTGCACATCTCCGCGCCGACGAGCAGGGGTTTCGCGAGGGGGAGCTCCAAGTACCGGGCGTCAAGTCCCAAGTGCAGCGCTGGGAGGCAAGGATGGGCCAG   | 690  |
| Q <sup>3</sup>       | GGAGGAGTTCGTGCACATCTCCGCGCCGACGAGCAGGGGTTTCGCGAGGGGGAGCTCCAAGTACCGGGCGTCAAGTCCCAAGTGCAGCGCTGGGAGGCAAGGATGGGCCAG   | 690  |
| Q <sup>4</sup>       | GGAGGAGTTCGTGCACATCTCCGCGCCGACGAGCAGGGGTTTCGCGAGGGGGAGCTCCAAGTACCGGGCGTCAAGTCCCAAGTGCAGCGCTGGGAGGCAAGGATGGGCCAG   | 690  |
| Q <sup>5</sup>       | GGAGGAGTTCGTGCACATCTCCGCGCCGACGAGCAGGGGTTTCGCGAGGGGGAGCTCCAAGTACCGGGCGTCAAGTCCCAAGTGCAGCGCTGGGAGGCAAGGATGGGCCAG   | 690  |
| Q                    | CTGCTCGGCAAGAAGTACATATATCTGGGCTCTTTGACAGCGAAGTTGAAGCTGCAAGGGCGTACGACAGGGCGGCGATTGCTTCAATGGGAGGGAAGCTGTGACTAACTTTG | 805  |
| Q <sup>1</sup>       | CTGCTCGGCAAGAAGTACATATATCTGGGCTCTTTGACAGCGAAGTTGAAGCTGCAAGGGCGTACGACAGGGCGGCGATTGCTTCAATGGGAGGGAAGCTGTGACTAACTTTG | 805  |
| Q <sup>2</sup>       | CTGCTCGGCAAGAAGTACATATATCTGGGCTCTTTGACAGCGAAGTTGAAGCTGCAAGGGCGTACGACAGGGCGGCGATTGCTTCAATGGGAGGGAAGCTGTGACTAACTTTG | 805  |
| Q <sup>3</sup>       | CTGCTCGGCAAGAAGTACATATATCTGGGCTCTTTGACAGCGAAGTTGAAGCTGCAAGGGCGTACGACAGGGCGGCGATTGCTTCAATGGGAGGGAAGCTGTGACTAACTTTG | 805  |
| Q <sup>4</sup>       | CTGCTCGGCAAGAAGTACATATATCTGGGCTCTTTGACAGCGAAGTTGAAGCTGCAAGGGCGTACGACAGGGCGGCGATTGCTTCAATGGGAGGGAAGCTGTGACTAACTTTG | 805  |
| Q <sup>5</sup>       | CTGCTCGGCAAGAAGTACATATATCTGGGCTCTTTGACAGCGAAGTTGAAGCTGCAAGGGCGTACGACAGGGCGGCGATTGCTTCAATGGGAGGGAAGCTGTGACTAACTTTG | 805  |
| Q                    | AGAGCAGCTCTACAAATGGGATGCTCCACCGGACGCCGAAATGAGGCAATTGTTGATGCTGATGCTCTTGACTTGGATCTCGGATGTCGCAACCCACCGCGCAGATCCCAA   | 920  |
| Q <sup>1</sup>       | AGAGCAGCTCTACAAATGGGATGCTCCACCGGACGCCGAAATGAGGCAATTGTTGATGCTGATGCTCTTGACTTGGATCTCGGATGTCGCAACCCACCGCGCAGATCCCAA   | 920  |
| Q <sup>2</sup>       | AGAGCAGCTCTACAAATGGGATGCTCCACCGGACGCCGAAATGAGGCAATTGTTGATGCTGATGCTCTTGACTTGGATCTCGGATGTCGCAACCCACCGCGCAGATCCCAA   | 920  |
| Q <sup>3</sup>       | AGAGCAGCTCTACAAATGGGATGCTCCACCGGACGCCGAAATGAGGCAATTGTTGATGCTGATGCTCTTGACTTGGATCTCGGATGTCGCAACCCACCGCGCAGATCCCAA   | 920  |
| Q <sup>4</sup>       | AGAGCAGCTCTACAAATGGGATGCTCCACCGGACGCCGAAATGAGGCAATTGTTGATGCTGATGCTCTTGACTTGGATCTCGGATGTCGCAACCCACCGCGCAGATCCCAA   | 920  |
| Q <sup>5</sup>       | AGAGCAGCTCTACAAATGGGATGCTCCACCGGACGCCGAAATGAGGCAATTGTTGATGCTGATGCTCTTGACTTGGATCTCGGATGTCGCAACCCACCGCGCAGATCCCAA   | 920  |
| Q                    | EAGGGACACATCATCGCGGCTTCAGTTAACTTTTATTGCCCTGAATCGTCAACCAATGATCTCTTCTCAGCCAATGAGCTCATCTTCTGCCAGTGGGCTGTGCATCAA      | 1035 |
| Q <sup>1</sup>       | EAGGGACACATCATCGCGGCTTCAGTTAACTTTTATTGCCCTGAATCGTCAACCAATGATCTCTTCTCAGCCAATGAGCTCATCTTCTGCCAGTGGGCTGTGCATCAA      | 1035 |
| Q <sup>2</sup>       | EAGGGACACATCATCGCGGCTTCAGTTAACTTTTATTGCCCTGAATCGTCAACCAATGATCTCTTCTCAGCCAATGAGCTCATCTTCTGCCAGTGGGCTGTGCATCAA      | 1035 |
| Q <sup>3</sup>       | EAGGGACACATCATCGCGGCTTCAGTTAACTTTTATTGCCCTGAATCGTCAACCAATGATCTCTTCTCAGCCAATGAGCTCATCTTCTGCCAGTGGGCTGTGCATCAA      | 1035 |
| Q <sup>4</sup>       | EAGGGACACATCATCGCGGCTTCAGTTAACTTTTATTGCCCTGAATCGTCAACCAATGATCTCTTCTCAGCCAATGAGCTCATCTTCTGCCAGTGGGCTGTGCATCAA      | 1035 |
| Q <sup>5</sup>       | EAGGGACACATCATCGCGGCTTCAGTTAACTTTTATTGCCCTGAATCGTCAACCAATGATCTCTTCTCAGCCAATGAGCTCATCTTCTGCCAGTGGGCTGTGCATCAA      | 1035 |
| Q                    | CATGGCACGGCAGTAGCACTCAGCAGCACCAGCGTTTGTACCCATCTGCTTGTGATGGTTCTACCCGAACTACAGGTGCAAGTGCAGGAGGAGGCCCATGGAGGCAAGGCCCC | 1150 |
| Q <sup>1</sup>       | CATGGCACGGCAGTAGCACTCAGCAGCACCAGCGTTTGTACCCATCTGCTTGTGATGGTTCTACCCGAACTACAGGTGCAAGTGCAGGAGGAGGCCCATGGAGGCAAGGCCCC | 1150 |
| Q <sup>2</sup>       | CATGGCACGGCAGTAGCACTCAGCAGCACCAGCGTTTGTACCCATCTGCTTGTGATGGTTCTACCCGAACTACAGGTGCAAGTGCAGGAGGAGGCCCATGGAGGCAAGGCCCC | 1150 |
| Q <sup>3</sup>       | CATGGCACGGCAGTAGCACTCAGCAGCACCAGCGTTTGTACCCATCTGCTTGTGATGGTTCTACCCGAACTACAGGTGCAAGTGCAGGAGGAGGCCCATGGAGGCAAGGCCCC | 1150 |
| Q <sup>4</sup>       | CATGGCACGGCAGTAGCACTCAGCAGCACCAGCGTTTGTACCCATCTGCTTGTGATGGTTCTACCCGAACTACAGGTGCAAGTGCAGGAGGAGGCCCATGGAGGCAAGGCCCC | 1150 |
| Q <sup>5</sup>       | CATGGCACGGCAGTAGCACTCAGCAGCACCAGCGTTTGTACCCATCTGCTTGTGATGGTTCTACCCGAACTACAGGTGCAAGTGCAGGAGGAGGCCCATGGAGGCAAGGCCCC | 1150 |
| Q                    | CTGAGCAGCCGCTGCTCTTCCCGGCTGGGGGTGGCAAGCGCAAGCATGCCGCGGGCTCTCCCACTCGGTTGCTTTACGCTGCAGGATATCAGATTTTCTACCGCCG        | 1265 |
| Q <sup>1</sup>       | CTGAGCAGCCGCTGCTCTTCCCGGCTGGGGGTGGCAAGCGCAAGCATGCCGCGGGCTCTCCCACTCGGTTGCTTTACGCTGCAGGATATCAGATTTTCTACCGCCG        | 1265 |
| Q <sup>2</sup>       | CTGAGCAGCCGCTGCTCTTCCCGGCTGGGGGTGGCAAGCGCAAGCATGCCGCGGGCTCTCCCACTCGGTTGCTTTACGCTGCAGGATATCAGATTTTCTACCGCCG        | 1265 |
| Q <sup>3</sup>       | CTGAGCAGCCGCTGCTCTTCCCGGCTGGGGGTGGCAAGCGCAAGCATGCCGCGGGCTCTCCCACTCGGTTGCTTTACGCTGCAGGATATCAGATTTTCTACCGCCG        | 1265 |
| Q <sup>4</sup>       | CTGAGCAGCCGCTGCTCTTCCCGGCTGGGGGTGGCAAGCGCAAGCATGCCGCGGGCTCTCCCACTCGGTTGCTTTACGCTGCAGGATATCAGATTTTCTACCGCCG        | 1265 |
| Q <sup>5</sup>       | CTGAGCAGCCGCTGCTCTTCCCGGCTGGGGGTGGCAAGCGCAAGCATGCCGCGGGCTCTCCCACTCGGTTGCTTTACGCTGCAGGATATCAGATTTTCTACCGCCG        | 1265 |
| miR172-binding sites |                                                                                                                   |      |
| Q                    | CGCGGCGGCAACTCGCCCGCGCGCGGCTACCGGACCAACACGGTTCTACTTCCCGCGCCGCGGCAACTGA                                            | 1344 |
| Q <sup>1</sup>       | CGCGGCGGCAACTCGCCCGCGCGCGGCTACCGGACCAACACGGTTCTACTTCCCGCGCCGCGGCAACTGA                                            | 1344 |
| Q <sup>2</sup>       | CGCGGCGGCAACTCGCCCGCGCGCGGCTACCGGACCAACACGGTTCTACTTCCCGCGCCGCGGCAACTGA                                            | 1344 |
| Q <sup>3</sup>       | CGCGGCGGCAACTCGCCCGCGCGCGGCTACCGGACCAACACGGTTCTACTTCCCGCGCCGCGGCAACTGA                                            | 1344 |
| Q <sup>4</sup>       | CGCGGCGGCAACTCGCCCGCGCGCGGCTACCGGACCAACACGGTTCTACTTCCCGCGCCGCGGCAACTGA                                            | 1344 |
| Q <sup>5</sup>       | CGCGGCGGCAACTCGCCCGCGCGCGGCTACCGGACCAACACGGTTCTACTTCCCGCGCCGCGGCAACTGA                                            | 1344 |

**Figure S2.** Alignment of the cDNA sequences of Q and five Q<sup>c</sup> alleles. The miRNA172-binding site is boxed with black lines.

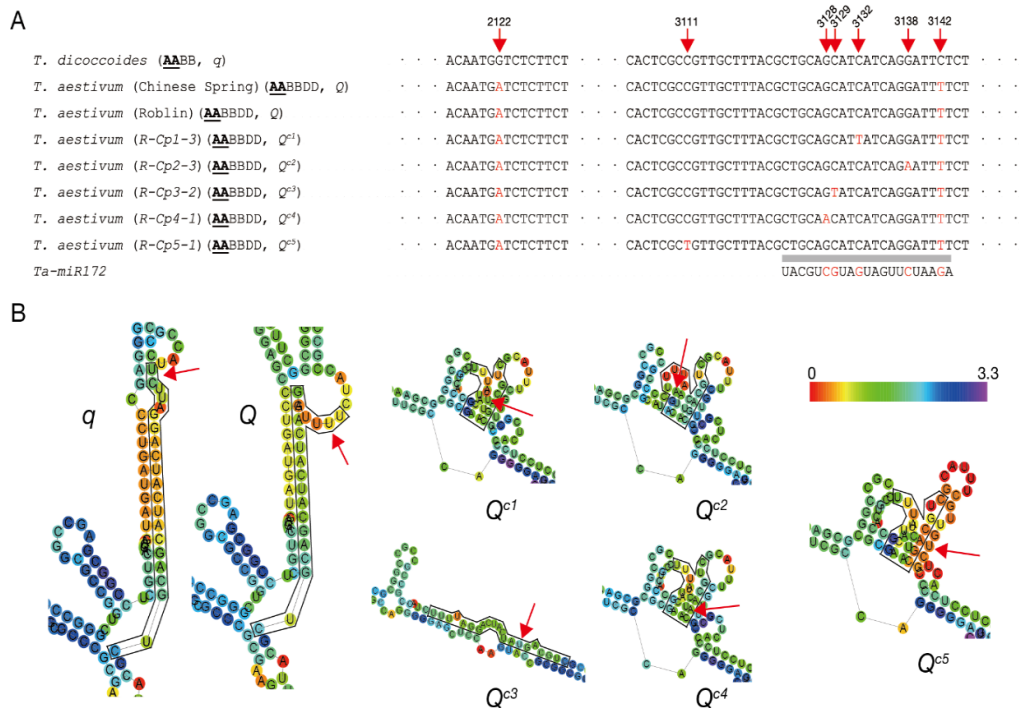

**Figure S3.** Effect of point mutations on the RNA secondary structure around the miRNA172-binding site. (A) Seven point-mutations in the DNA sequences of *q/Q/Q<sup>c1</sup>/Q<sup>c2</sup>/Q<sup>c3</sup>/Q<sup>c4</sup>/Q<sup>c5</sup>* alleles. The underlined is the miRNA172-binding site. The Genebank numbers are in order of AY702957.1, KX620763.1, KX620765-KX620768, and MW419115. (B) Comparison of the predicted RNA secondary structures of *q/Q/Q<sup>c1</sup>/Q<sup>c2</sup>/Q<sup>c3</sup>/Q<sup>c4</sup>/Q<sup>c5</sup>* alleles around the miRNA172-binding site, which drawing encoding positional entropy. The heat maps indicate the positional entropy, from low (red) to high (purple). The miRNA172-binding site is boxed with black lines. The red arrows represent the point mutations.

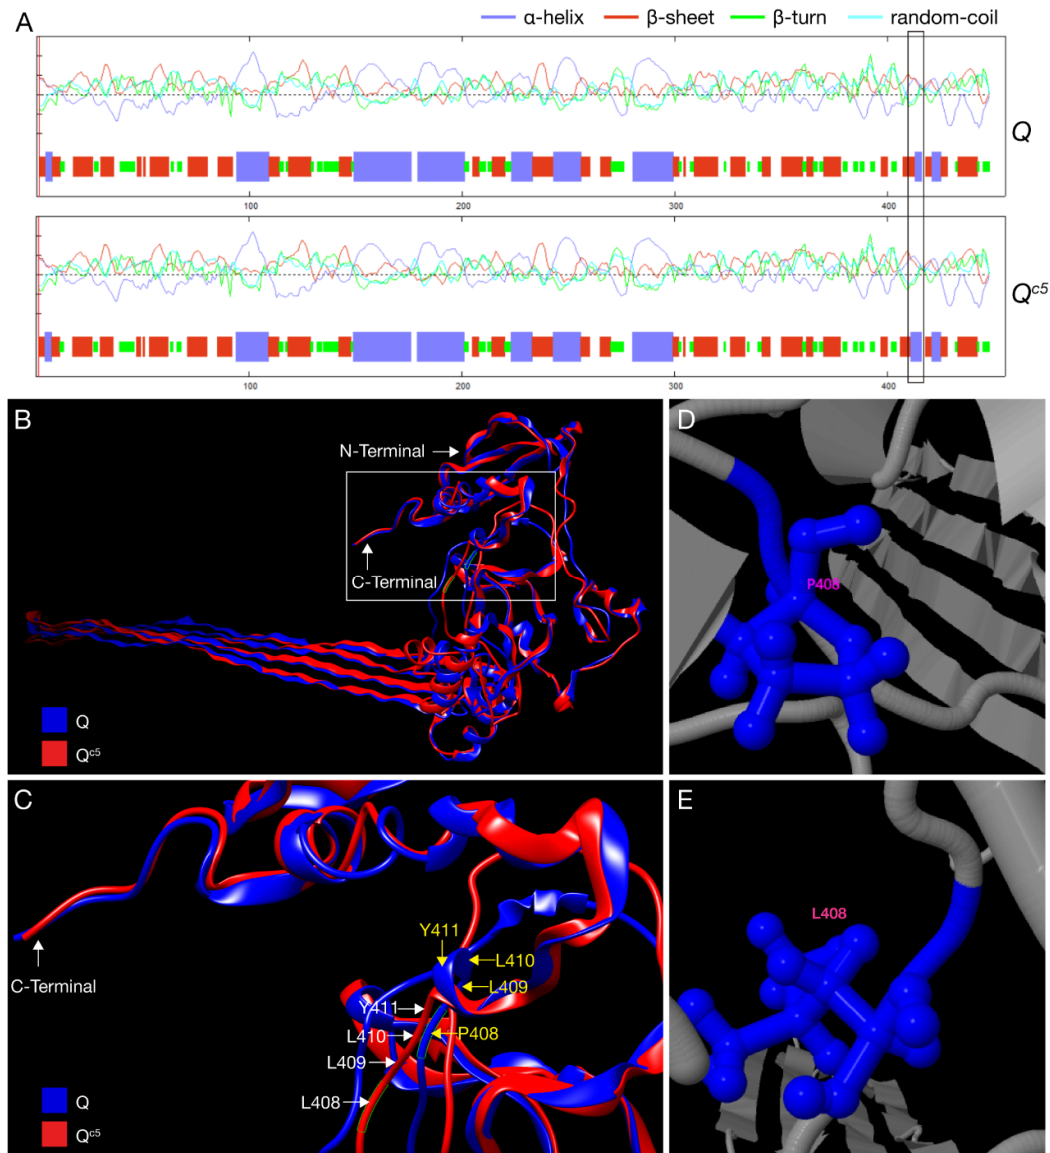

**Figure S4.** The number of amino acid residues for forming  $\alpha$ -helix is more in  $Q^{c5}$  than in  $Q$  around the changed residue. (A) Comparison of predicted secondary structures of  $Q$  and  $Q^{c5}$ . The difference between  $Q$  and  $Q^{c5}$  is boxed by black line. (B-E) Comparison of 3D structure model of  $Q$  and  $Q^{c5}$ . (B) The superposition of full-length  $Q$  and  $Q^{c5}$  was compared by TM-align. (C) Magnification of the white box in (B). The yellow arrows show the position and type of amino acid residues in  $Q$  and the white arrows show that in  $Q^{c5}$ . The  $\alpha$ -helix in the is ended in 409<sup>th</sup> residue of  $Q$  protein and 411<sup>th</sup> residue in  $Q^{c5}$ . (D) and (E) show the structure of 408<sup>th</sup> residue, in which (D) present proline in  $Q$  and (E) present leucine in  $Q^{c5}$ .



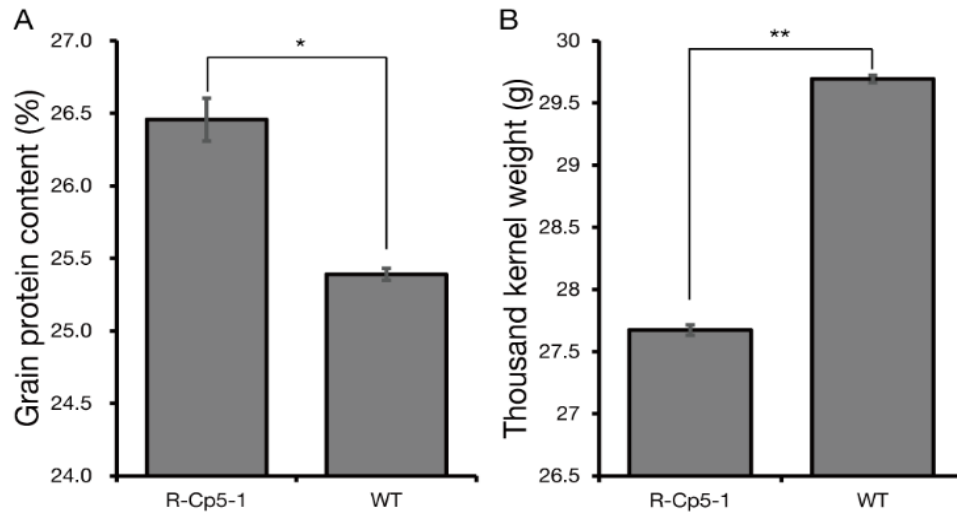

**Figure S5.** Comparison of the grain protein content (A) and thousand kernel weight (B) between *R-Cp5-1* and its WT in the glasshouse experiment.

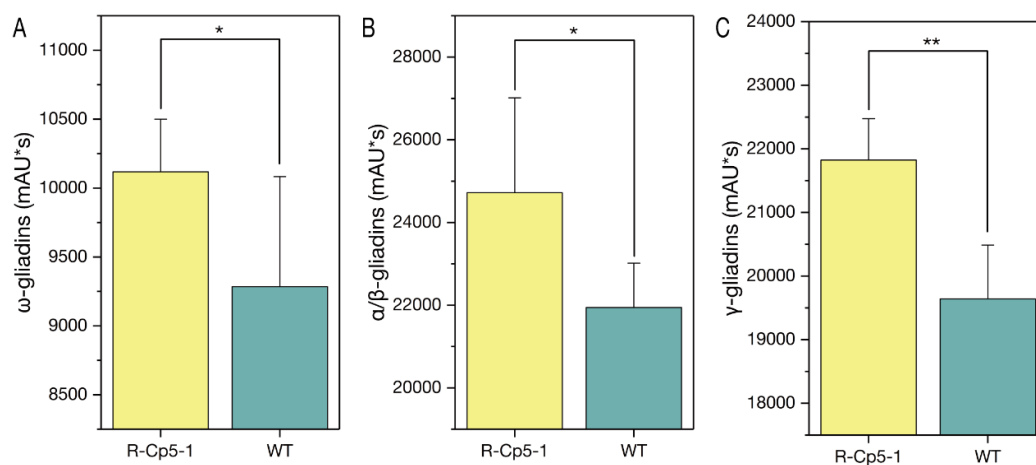

**Figure S6.** Comparison of the contents of  $\alpha$ - ( $\alpha/\beta$ -) (A),  $\gamma$ - (B) and  $\omega$ -gliadins (C) of *R-Cp5-1* and its WT.

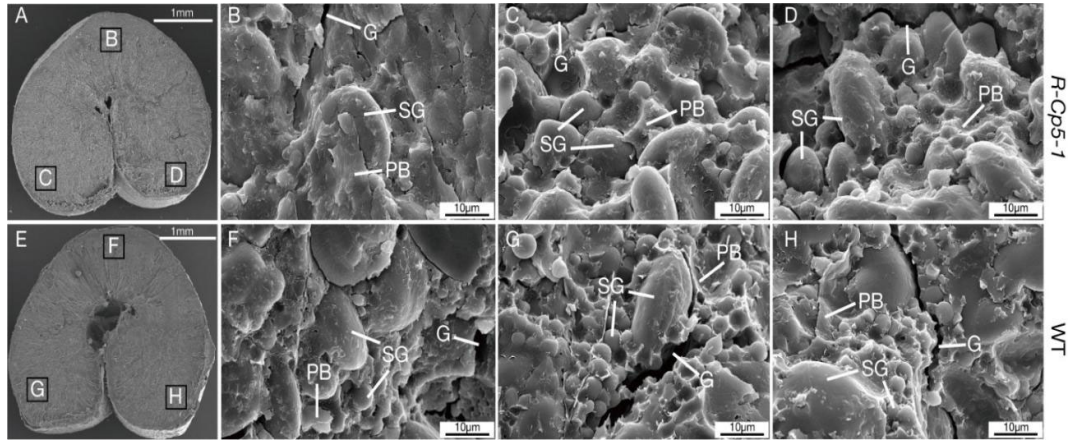

**Figure S7.** Scanning electron microscopic observation of three representative areas of the endosperm of mature seeds. (A-D) and (E-H) are images of cross-sections of *R-Cp5-1* and its WT, respectively. (B-D, E-H) Magnifications of the black boxes in (A) and (E), respectively. PB, protein body; SG, starch granule; G, gap between PB and SG. Scale bars, 1 mm in (A) and (E), and 10 μm in others.

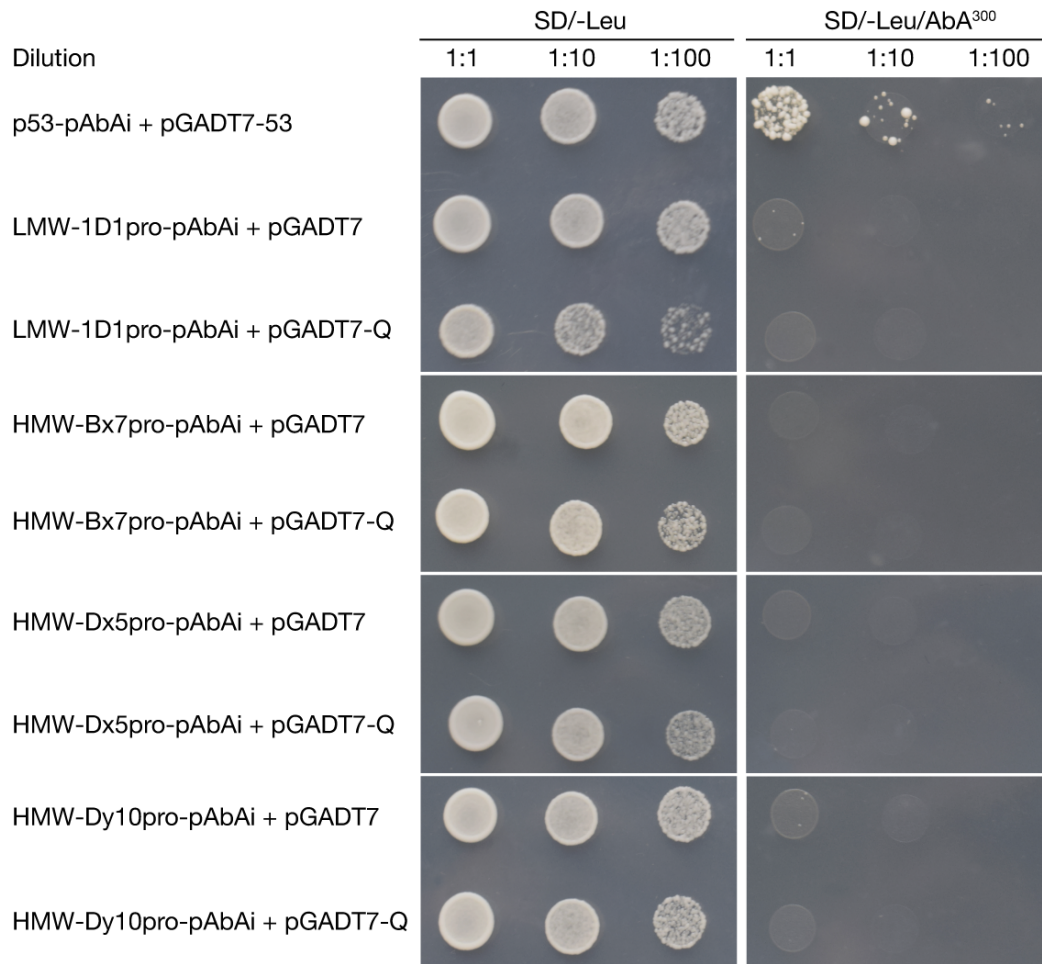

**Figure S8.** Yeast one-hybrid analysis showing that Q cannot bind the promoter of SSPs. Yeast cells were co-transformed with each combination. Cells were grown in liquid medium to an OD<sub>600</sub> of 0.7, and a dilution series was prepared. For each dilution, cells were spotted onto medium (synthetic dropout, -Leu) supplemented with 300 ng/mL Aureobasidin A (AbA) to suppress background growth. The combination of p53-pAbAi and pGADT7-53 was used as positive control; each SSP promoter was co-transformed with pGADT7 as its negative control.



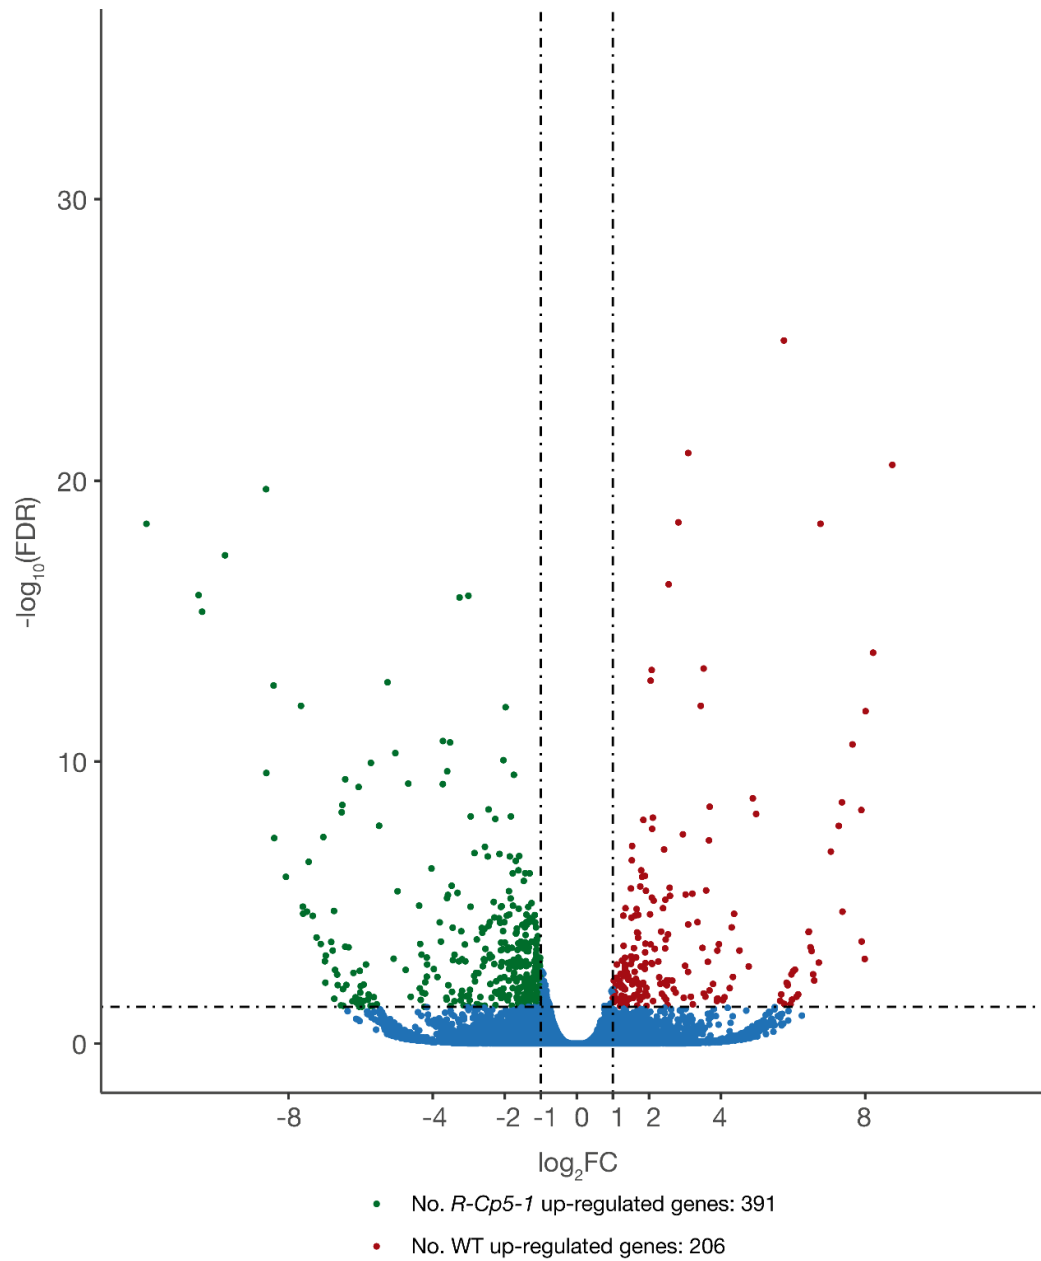

**Figure S9.** Volcano plot shows the DEGs in RNA-seq data.

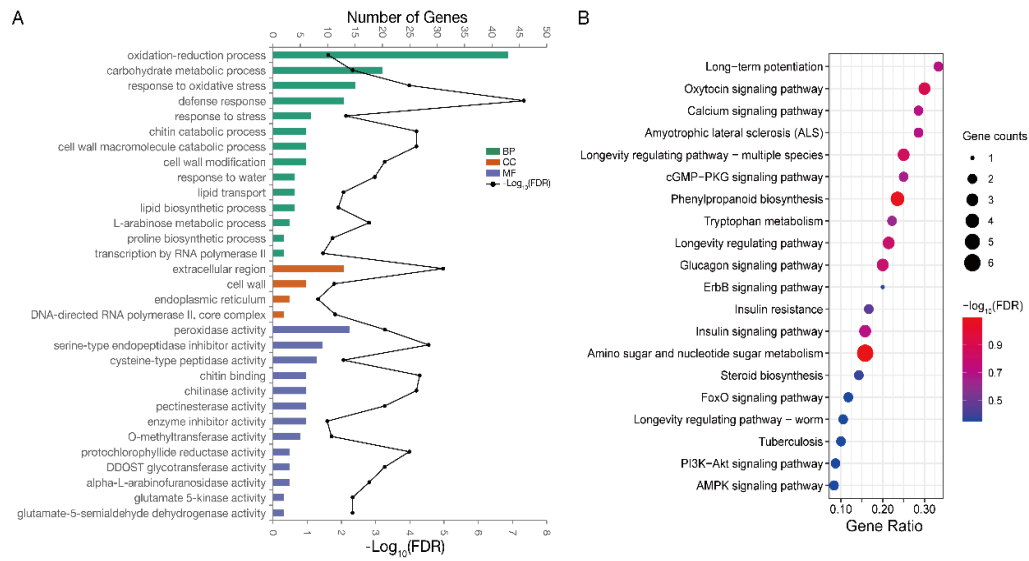

**Figure S10.** GO items (A) and top 20 KEGG pathways (B) enriched in DEGs between *R-Cp5-1* and its WT.

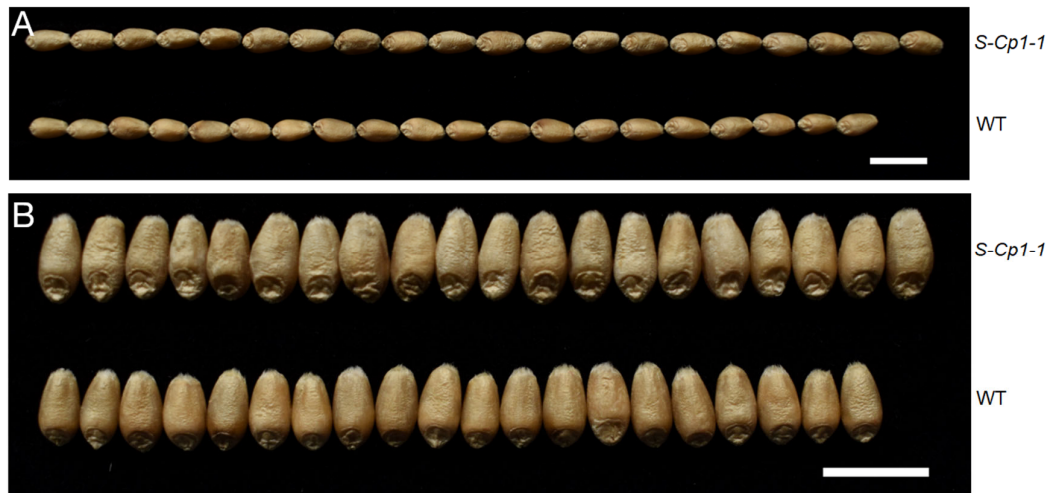

**Figure S11.** Comparison of seed length and seed width between *S-Cp1-1* (with  $Q^{cl}$  allele) and its WT (with  $Q$  allele). Length (A) and width (B) of 20 seeds of *S-Cp1-1* (up) and its WT (down). Scale bar, 1 cm.





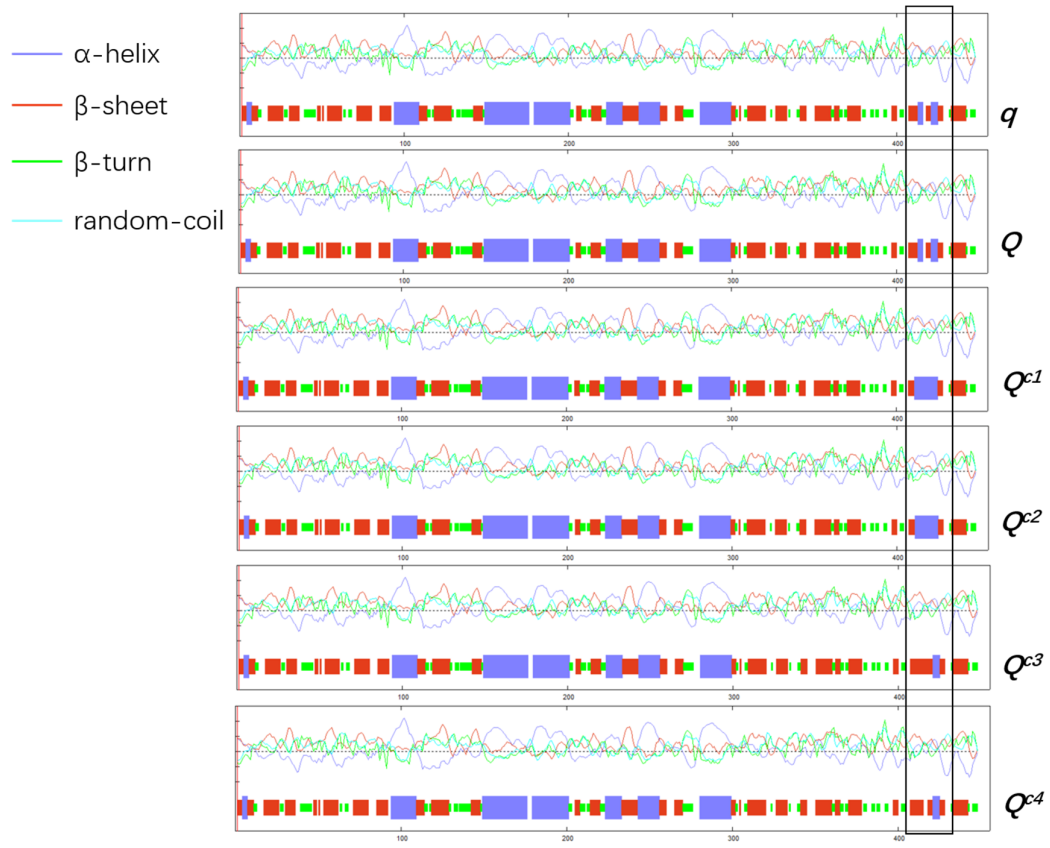

**Figure S13.** Comparison of the predicted secondary structures of  $q$ ,  $Q$ , and  $Q^{c1}$ - $Q^{c4}$ . The black frame highlights the amino acid substitutions.

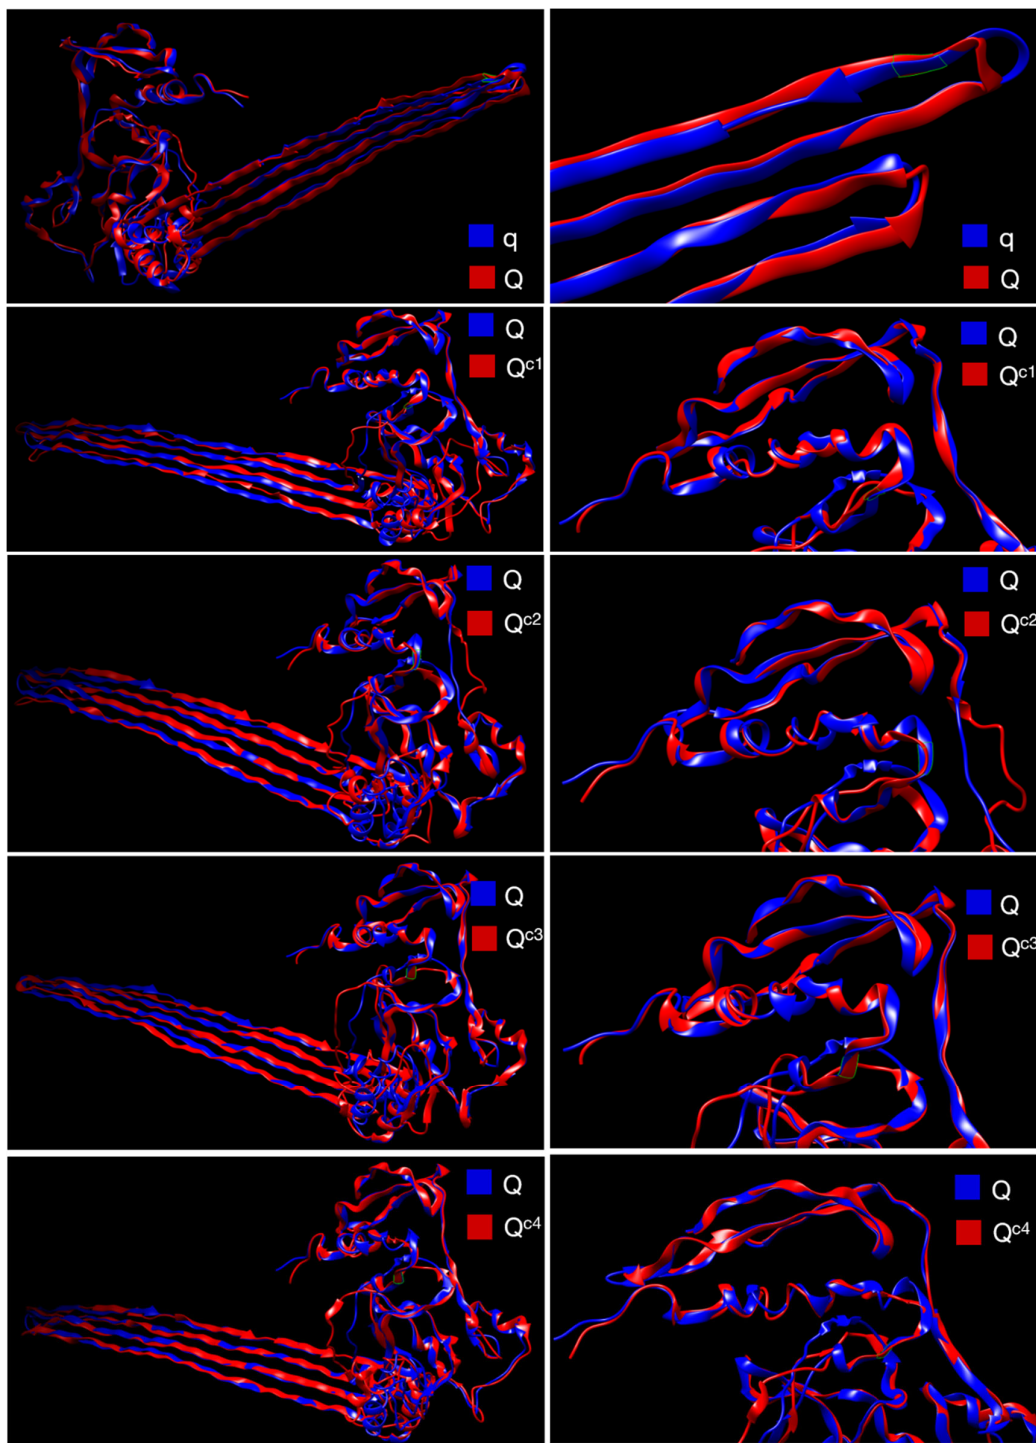

**Figure S14.** Comparison of the predicted 3D protein structures of  $q$ ,  $Q$ , and  $Q^{c1}$ - $Q^{c4}$ .
